# Supplementary material for: Urinary Extracellular Vesicles and Salt-Losing Tubulopathies: A Proteomic Approach
Source: MDPI journal article supplement (doi:10.3390/proteomes8020009), 2020-05-09
Supplement: s1 [file s1]

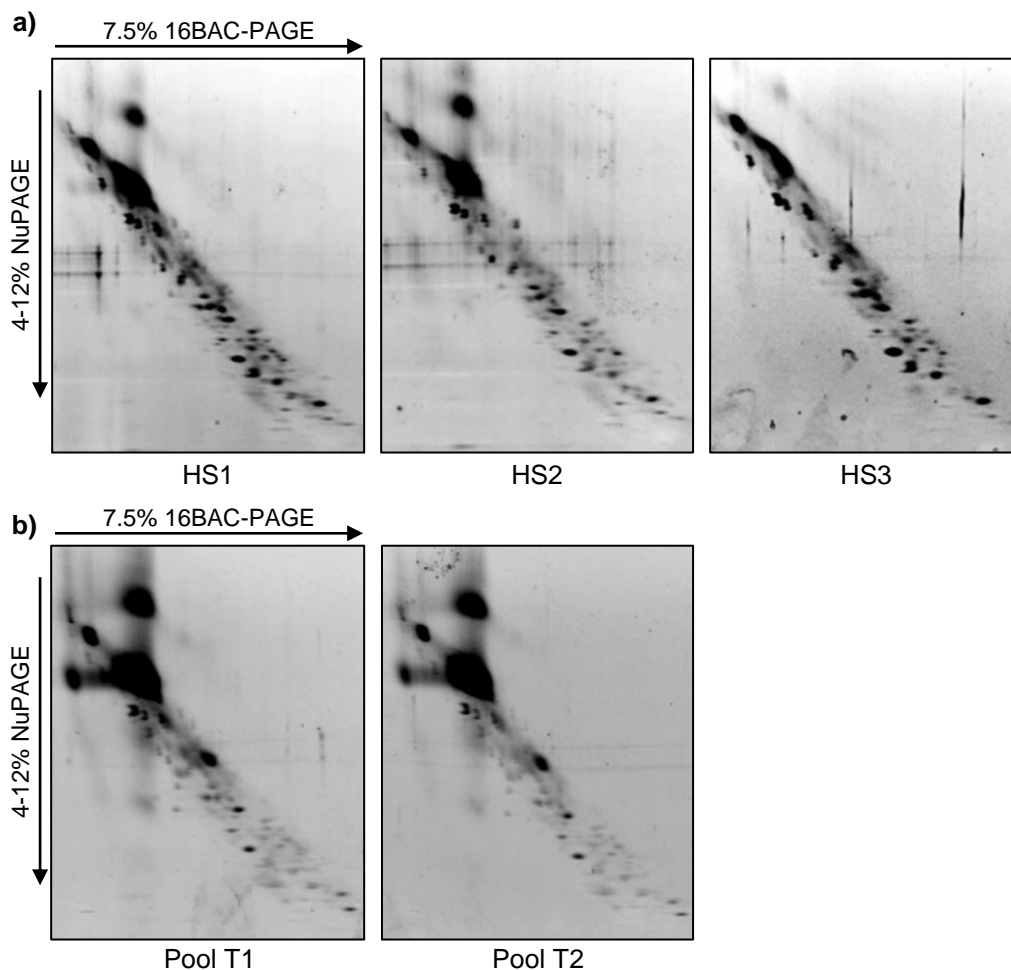

**Supplementary Figure S2. Reproducibility of uEV protein profiles by 2D diagonal electrophoresis.** a) Protein separation of uEV from three healthy subjects (HS1-3) by 16-BAC/SDS-PAGE and SyproRuby gel staining (biological replicates). b) Diagonal protein profile of the same uEV pool from BS3 patients analysed twice, at different times (T1 and T2) (technical replicates).
