# Supplementary material for: Urinary Extracellular Vesicles and Salt-Losing Tubulopathies: A Proteomic Approach
Source: MDPI journal article supplement (doi:10.3390/proteomes8020009), 2020-05-09
Supplement: s1 [file s1]

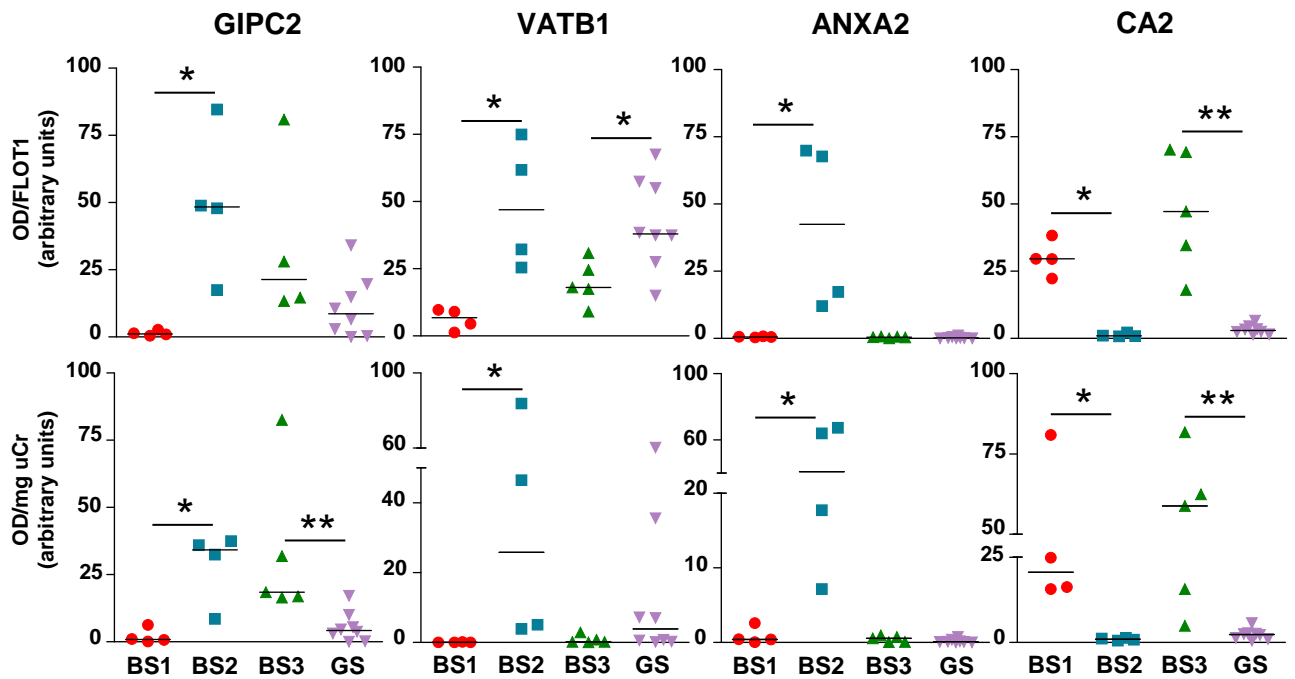

**Supplementary Figure S5. Normalization of uEV protein content.** Densitometric analysis of protein signals normalized by FLOT1, considered an EV “housekeeping” proteins (upper panels) and by urinary creatinine. Scatter plot of all patient data. Statistical analysis: red asterisks represent Kruskal-Wallis multivariate analysis, \*  $p$ -value < 0.05; \*\*\*  $p$ -value < 0.001; \*\*\*\*  $p$ -value < 0.0001; black asterisks represent Mann-Whitney  $t$ -test: \*  $p$ -value < 0.05; \*\*  $p$ -value < 0.01; \*\*\*  $p$ -value < 0.001.
