# Supplementary material for: Urinary Extracellular Vesicles and Salt-Losing Tubulopathies: A Proteomic Approach
Source: MDPI journal article supplement (doi:10.3390/proteomes8020009), 2020-05-09
Supplement: s1 [file s1]

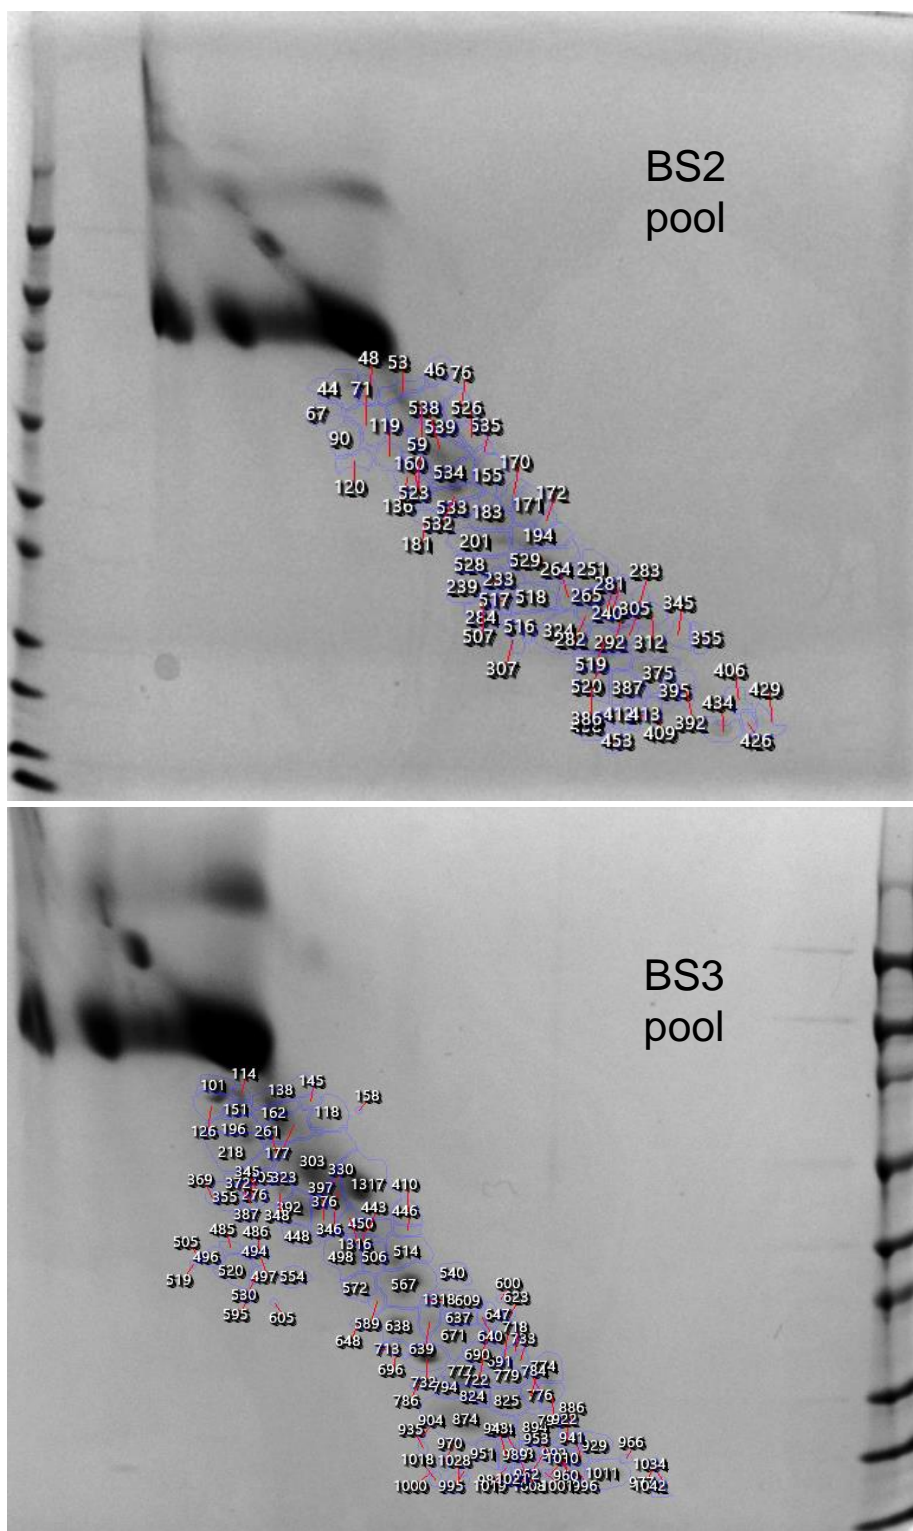

**Supplementary figure S3.** Number of spots obtained from image analysis (BS1 vs BS2 and BS3 vs GS) performed by SameSpots 2D Gel Image Analysis Software (TotalLab).
